# Supplementary material
Source: PubMed Central journal article supplement (PMC4276161)
Supplement: ijcem0007-3954-f6.pdf [file ijcem0007-3954-f6.pdf]

## Oral contraceptive use and kidney cancer

**Table S1.** Sensitivity analyses: RRs, 95% CIs and *P* values after excluding each study

| Excluded Study   | RR <sup>a</sup> (95% CI) | I <sup>2</sup> (%) | P     |
|------------------|--------------------------|--------------------|-------|
| McCredie M       | 0.90 (0.82-0.99)         | 0                  | 0.712 |
| Mellemgaard A    | 0.89 (0.81-0.98)         | 0                  | 0.625 |
| Lindblad P       | 0.92 (0.83-1.01)         | 0                  | 0.883 |
| Chow HW          | 0.90 (0.82-0.98)         | 0                  | 0.636 |
| Gago-Dominguez M | 0.87 (0.81-0.98)         | 0                  | 0.664 |
| Molokwu JC       | 0.89 (0.81-0.98)         | 0                  | 0.633 |
| Kabat GC         | 0.90 (0.82-0.99)         | 0                  | 0.673 |
| Zucchetto A      | 0.89 (0.81-0.98)         | 0                  | 0.625 |
| Setiawan VW      | 0.88 (0.80-0.97)         | 0                  | 0.729 |
| Lee JE           | 0.88 (0.80-0.97)         | 0                  | 0.676 |
| Purdue MP        | 0.88 (0.80-0.97)         | 0                  | 0.795 |
| Karami S         | 0.91 (0.81-1.02)         | 0                  | 0.640 |

<sup>a</sup>Summary RRs (95% CIs) were calculated using the fixed or random effects model based on the results of I<sup>2</sup>-statistics.

**Table S2.** Sensitivity analyses: RRs, 95% CIs and *P* values after excluding each study

| Study removed    | RR <sup>a</sup> (95% CI) | I <sup>2</sup> (%) | p     |
|------------------|--------------------------|--------------------|-------|
| Mellemgaard A    | 0.80 (0.68-0.94)         | 33.9               | 0.158 |
| Lindblad P       | 0.83 (0.70-0.99)         | 7.4                | 0.373 |
| Chow HW          | 0.81 (0.69-0.96)         | 9.9                | 0.354 |
| Gago-Dominguez M | 0.77 (0.65-0.91)         | 9.9                | 0.353 |
| Kabat GC         | 0.80 (0.67-0.95)         | 33.9               | 0.158 |
| Setiawan VW      | 0.78 (0.65-0.92)         | 27.7               | 0.208 |
| Lee JE           | 0.79 (0.66-0.94)         | 33.0               | 0.165 |
| Purdue MP        | 0.78 (0.66-0.92)         | 26.2               | 0.219 |
| Karami S         | 0.84 (0.69-1.02)         | 28.7               | 0.199 |

<sup>a</sup>Summary RRs (95% CIs) were calculated using the fixed or random effects model based on the results of I<sup>2</sup>-statistics.
